# Supplementary material for: A Sustainable Synthetic Approach to Tacrine and Cholinesterase Inhibitors in Deep Eutectic Solvents under Aerobic Conditions
Source: MDPI journal article supplement (doi:10.3390/molecules29061399), 2024-03-21

## Supporting Information

### A Sustainable Synthetic Approach to Tacrine and Cholinesterase Inhibitors in Deep Eutectic Solvents under Aerobic Conditions

Luciana Cicco,\* Filippo Maria Perna, Vito Capriati \* and Paola Vitale

Dipartimento di Farmacia–Scienze del Farmaco, Università degli Studi di Bari “Aldo Moro”,  
Consorzio C.I.N.M.P.I.S. Via E. Orabona 4, 70125 Bari (Italy).

Correspondence: vito.capriati@uniba.it (V.C.); luciana.cicco@uniba.it (L.C.); Tel.: +39-080-5442174 (V.C.); +39-080-5442773 (L.C.)

### Table of Contents

|                                                                                                                             |     |
|-----------------------------------------------------------------------------------------------------------------------------|-----|
| 1. Table S1. Solvent and base screening for the synthesis of <i>N</i> -propargyl-substituted Tacrine derivative <b>4a</b> . | S2  |
| 2. E-factor calculations                                                                                                    | S3  |
| 3. Green metrics                                                                                                            | S5  |
| 4. <sup>1</sup> H and <sup>13</sup> C NMR spectra                                                                           | S10 |

**Table S1.** Solvent and base screening for the synthesis of *N*-propargyl-substituted Tacrine derivative **4a**.<sup>a</sup>

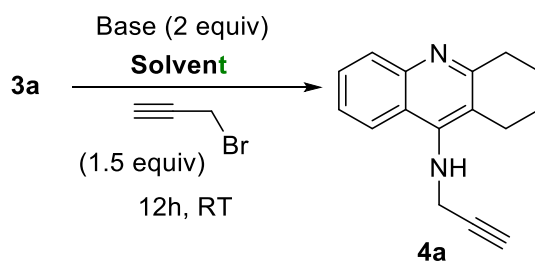

| Entry | Solvent <sup>b</sup>                   | Base                            | Yield (%) <sup>c</sup> |
|-------|----------------------------------------|---------------------------------|------------------------|
| 1     | ChCl/Gly (1:2 mol mol <sup>-1</sup> )  | KOH                             | 20                     |
| 2     | ChCl/Gly (1:2 mol mol <sup>-1</sup> )  | <i>t</i> -BuOK                  | NR                     |
| 3     | ChCl/Gly (1:2 mol mol <sup>-1</sup> )  | K <sub>2</sub> CO <sub>3</sub>  | NR                     |
| 4     | ChCl/urea (1:2 mol mol <sup>-1</sup> ) | KOH                             | NR                     |
| 5     | ChCl/urea (1:2 mol mol <sup>-1</sup> ) | K <sub>2</sub> CO <sub>3</sub>  | NR                     |
| 6     | ChCl/urea (1:2 mol mol <sup>-1</sup> ) | Cs <sub>2</sub> CO <sub>3</sub> | NR                     |
| 7     | ChOAc/Gly (1:2 mol mol <sup>-1</sup> ) | KOH                             | NR                     |
| 8     | 2-methyltetrahydrofuran (2-MeTHF)      | KOH                             | NR                     |
| 9     | cyclopentyl methyl ether (CPME)        | KOH                             | 50 <sup>d</sup>        |
| 10    | CPME                                   | NaH                             | NR                     |
| 11    | CPME                                   | LiOH                            | NR                     |

<sup>a</sup> General conditions: reactions performed at room temperature (RT, 25 °C).; <sup>b</sup> solvent: 2 mL; ChCl: choline chloride; Gly: glycerol; ChOAc: choline acetate. NR = no reaction. <sup>c</sup> Isolated yield. <sup>d</sup> Reaction carried out on 1 mmol (198 mg) of **3a**, 2 equiv of base, 1.5 equiv (114 μL) of propargyl bromide, and 2 mL of CPME.

## 1. E-factor calculations

According to its original definition (*Green Chem.* **2007**, 9, 1273), the Sheldon E-factor value (total mass of waste/mass of product) takes into account only the mass of waste generated in a process, and its calculation is performed by simply dividing the sum of the molecular weight of all substances produced by molecular weight of the desired products, with reference to the stoichiometric equation. Thus, the amount of silica gel, the celite pad, the drying agents, and the mass of eluent solvent used for chromatography are usually not included in the calculation. We have followed this general equation in our own calculations. Note: EtOAc 0.902 g/mL, at 25 °C; iPrOH 0.786 g/mL, at 25 °C; NaOH 10% 1.11 g/mL; MeOH 0.792 g/mL.

### Classical synthesis of Tacrine 3a

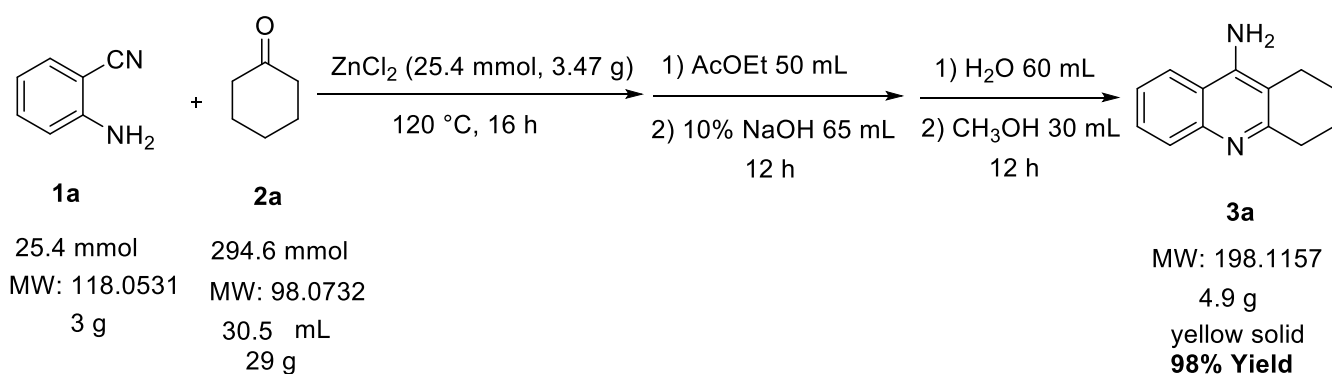

Total amount of reactants: 3 g (**1a**) + 29 g (**2a**) + 3.47 g (ZnCl<sub>2</sub>) + 45.1 g (AcOEt) + 23.76 g (MeOH) = 104.33 g

Amount of the final product: 4.95 g

Amount of waste: 104.33 g – 4.95 g = 99.38 g

E-factor: amount of waste/amount of product = 99.38/4.95 = 20

## Eco-friendly synthesis of Tacrine 3a

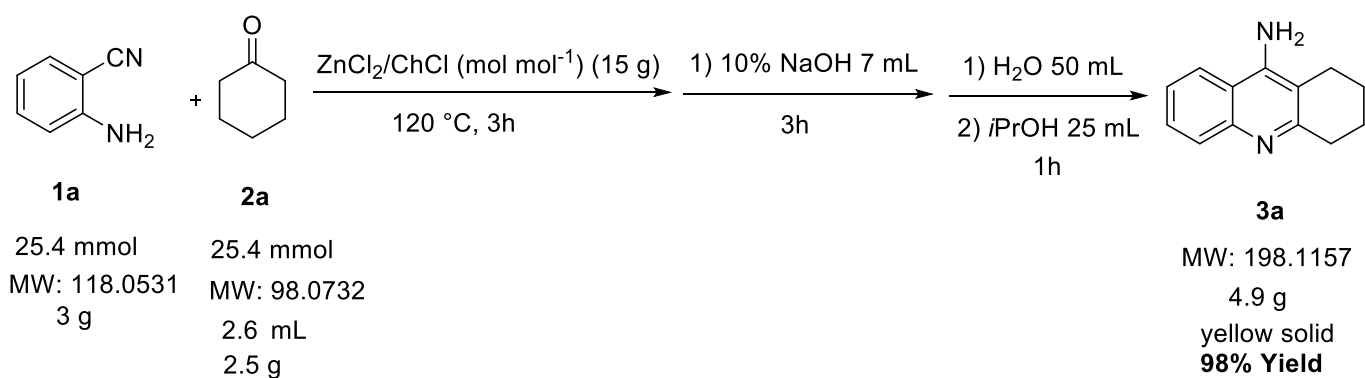

Total amount of reactants: 15 g (DES) + 3 g (**1a**) + 2.5 g (**2a**) + 20 g (*i*PrOH) = 40.5 g

Amount of the final product: 4.9 g

Amount of waste: 40.5 g – 4.9 g = 35.6 g

E-factor: amount of waste/amount of product = amount of waste/amount of product = 35.6 g/4.9 g = 7

### 3. Green metrics

| Metric                   | Acronym                                                                                                                                                                                                                                                                                  | Formula                                                                                                        |
|--------------------------|------------------------------------------------------------------------------------------------------------------------------------------------------------------------------------------------------------------------------------------------------------------------------------------|----------------------------------------------------------------------------------------------------------------|
| Percentage yield         | Y (%)                                                                                                                                                                                                                                                                                    | $\frac{\text{mol of product}}{\text{mol of limiting reactant}} \times 100$                                     |
| Percentage conversion    | Conv. (%)                                                                                                                                                                                                                                                                                | $\frac{\text{final mass of limiting reactant (kg)}}{\text{initial mass of limiting reactant (kg)}} \times 100$ |
| Percentage selectivity   | Sel. (%)                                                                                                                                                                                                                                                                                 | $\frac{\% \text{ Yield}}{\% \text{ Conv.}} \times 100$                                                         |
| Reaction mass efficiency | RME                                                                                                                                                                                                                                                                                      | $\frac{\text{mass of product (kg)}}{\Sigma \text{ mass reagents (kg)}} \times 100$                             |
| Atom economy             | AE                                                                                                                                                                                                                                                                                       | $\frac{\text{m. w product}}{\Sigma \text{ m. w. reagents}} \times 100$                                         |
| Effective mass yield     | EM                                                                                                                                                                                                                                                                                       | $\frac{\text{mass of products (kg)}}{\text{mass of non benign reagents (kg)}} \times 100$                      |
| Optimum efficiency       | OE                                                                                                                                                                                                                                                                                       | $\frac{\text{RME}}{\text{AE}} \times 100$                                                                      |
| Process mass intensity   | PMI                                                                                                                                                                                                                                                                                      | $\frac{\text{total mass in a process}}{\text{mass of product}}$                                                |
| Renewables intensity     | RI                                                                                                                                                                                                                                                                                       | $\frac{\text{mass of all renewably derivable materials used}}{\text{mass of product}}$                         |
| Renewables percentage    | RP                                                                                                                                                                                                                                                                                       | $\frac{\text{RI}}{\text{PMI}} \times 100$                                                                      |
| Detailed solvents        | <i>Recommended, Problematic, Hazardous, Highly Hazardous</i>                                                                                                                                                                                                                             |                                                                                                                |
| Energy                   | <ul style="list-style-type: none"> <li>• 0–70 °C <i>Green Flag</i></li> <li>• To 140 °C <i>Yellow Flag</i></li> <li>• Reflux <i>Red Flag</i></li> </ul>                                                                                                                                  |                                                                                                                |
| Workup                   | <ul style="list-style-type: none"> <li>• <i>Green Flag</i>: quenching, filtration, centrifugation, crystallisation,</li> <li>• <i>Amber Flag</i>: solvent exchange, quenching into aqueous solvent.</li> <li>• <i>Red Flag</i>: chromatography, high temperature distillation</li> </ul> |                                                                                                                |

## Quantitative metrics of classical and eco-friendly approach for the synthesis of Tacrine

3a

### Classical synthesis of Tacrine 3a

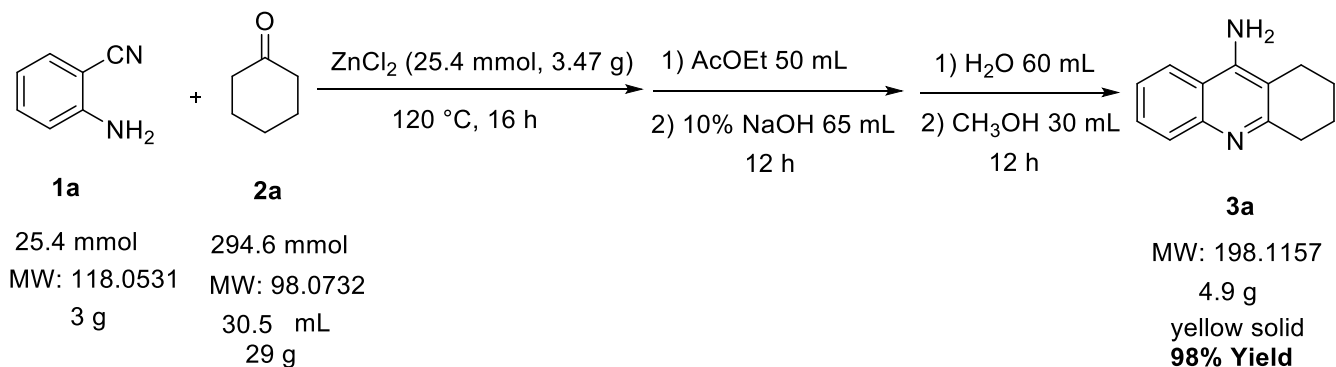

**Work-up:** Light Green Flag.

**Detailed Solvent:** CH<sub>3</sub>OH: problematic and hazardous. AcOEt and H<sub>2</sub>O: recommended.

### Eco-friendly synthesis of Tacrine 3a

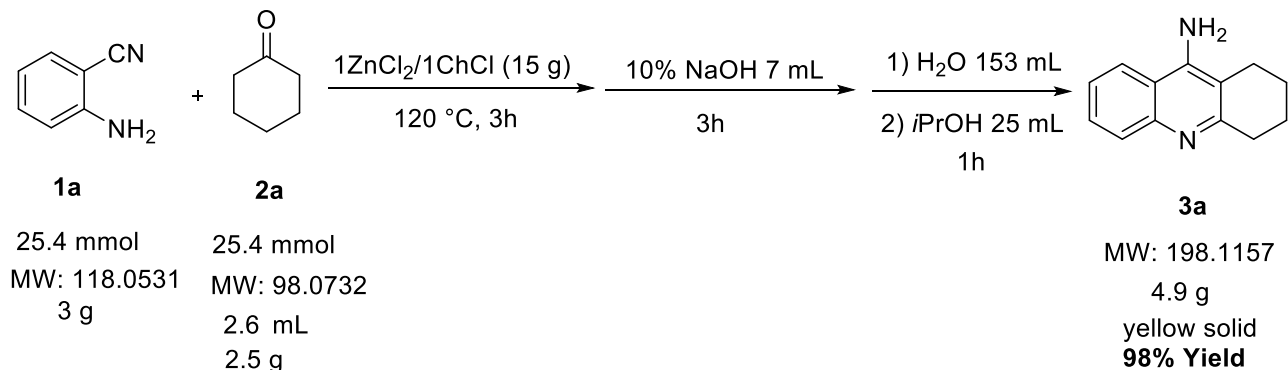

**Work-up:** Green Flag.

**Detailed Solvent:** H<sub>2</sub>O, *i*PrOH: recommended

AE

### Classical synthesis of Tacrine 3a

*M. W. Reactants:* 118.0531 (**1a**) + 98.0732 (**2a**) = 216.1263

$$AE = 198.1157/216.1263 \times 100 = 92\%$$

### **Eco-friendly synthesis of Tacrine 3a**

$$M. W. \text{ Reactants: } 118.0531 \text{ (1a)} + 98.0732 \text{ (2a)} = 216.1263$$

$$AE = 198.1157/216.1263 \times 100 = 92\%$$

### **RME**

$$\text{Classical synthesis of Tacrine 3a: } 4.9 \text{ g}/32.0 \text{ g } [3.0 \text{ g (1a)} + 29.0 \text{ g (2a)}] \times 100 = 15\%$$

$$\text{Eco-friendly synthesis of Tacrine 3a: } 4.9 \text{ g}/5.5 \text{ g } [3 \text{ g (1a)} + 2.5 \text{ g (2a)}] \times 100 = 89\%$$

### **OE**

$$\text{Classical synthesis of Tacrine 3a: } 15/92 \times 100 = 16\%$$

$$\text{Eco-friendly synthesis of Tacrine 3a: } 89/92 \times 100 = 97\%$$

### **EM**

#### **Classical synthesis of Tacrine 3a**

*Mass of non-benign reagents: 3g (1a)*

$$EM = 4.9 \text{ g}/[3 \text{ (1a)} + 29 \text{ (2a)} + 3.5 \text{ (ZnCl}_2\text{)} + 23.8 \text{ (MeOH)} = 59.3] \text{ g} \times 100 = 8.3\%$$

#### **Eco-friendly synthesis of Tacrine 3a**

*Mass of non-benign reagents: 3g (1a)*

$$EM = 4.9 \text{ g}/[3 \text{ (1a)} + 2.5 \text{ (2a)} + 8.0 \text{ (ZnCl}_2\text{)} = 13.5] \text{ g} \times 100 = 36.3\%$$

### **PMI**

#### **Classical synthesis of Tacrine 3a**

Total amount of reactants: 3 g (**1a**) + 29 g (**2a**) + 3.47 g (ZnCl<sub>2</sub>) = 35.47 g

Amount of the final product: 4.9 g

$$\text{PMI}_{\text{RXN}}^{\text{a}} 35.47 \text{ g}/4.9 \text{ g} = 7.2 \text{ g g}^{-1}$$

$$\text{PMI}_{\text{WU}}^{\text{b}} 236.48 \text{ g}/4.9 \text{ g} = 48.3 \text{ g g}^{-1}$$

$$3 \text{ g (1a)} + 29 \text{ g (2a)} + 3.47 \text{ g (ZnCl}_2\text{)} + 45.1 \text{ g (AcOEt)} + 72.15 \text{ g (NaOH)} + 60 \text{ g (H}_2\text{O)} + 23.76 \text{ g (MeOH)} = 236.48 \text{ g}$$

### Eco-friendly synthesis of Tacrine 3a

Total amount of reactants: 3 g (**1a**) + 15 g (DES) + 2.5 g (**2a**) = 20.5 g

Amount of the final product: 4.9 g

$$\text{PMI}_{\text{RXN}}^{\text{a}} = 20.5 \text{ g}/4.9 \text{ g} = 4.2 \text{ g g}^{-1}$$

$$\text{PMI}_{\text{WU}}^{\text{b}} = 97.92 \text{ g}/4.9 \text{ g} = 20.0 \text{ g g}^{-1}$$

$$3 \text{ g (1a)} + 2.5 \text{ g (2a)} + 15 \text{ g (DES)} + 7.77 \text{ g (NaOH)} + 50 \text{ g (H}_2\text{O)} + 19.65 \text{ g (iPrOH)} = 97.92 \text{ g}$$

<sup>a</sup> Process mass intensity (PMI)<sub>RXN</sub>: chemicals and reaction solvents.

<sup>b</sup> Process mass intensity (PMI)<sub>WU</sub>: chemicals and reaction solvents, solvents, and reagents in workup.

## RI and RP

### Classical synthesis of Tacrine 3a

Renewable sources: 60 g (H<sub>2</sub>O)

$$\text{RI: } 60 \text{ g}/4.9 \text{ g} = 12.2 \quad \text{RP: } 12.2/48.3 \times 100 = 25.2\%$$

### Eco-friendly synthesis of Tacrine 3a

Renewable sources: 15 g (DES) + 50 g (H<sub>2</sub>O) = 65 g

$$\text{RI: } 65 \text{ g}/4.9 \text{ g} = 13.3 \quad \text{RP: } 13.3/20.0 \times 100 = 66.5\%$$



#### 4. $^1\text{H}$ and $^{13}\text{C}$ NMR spectra

$^1\text{H}$  NMR, 600 MHz,  $\text{CDCl}_3$

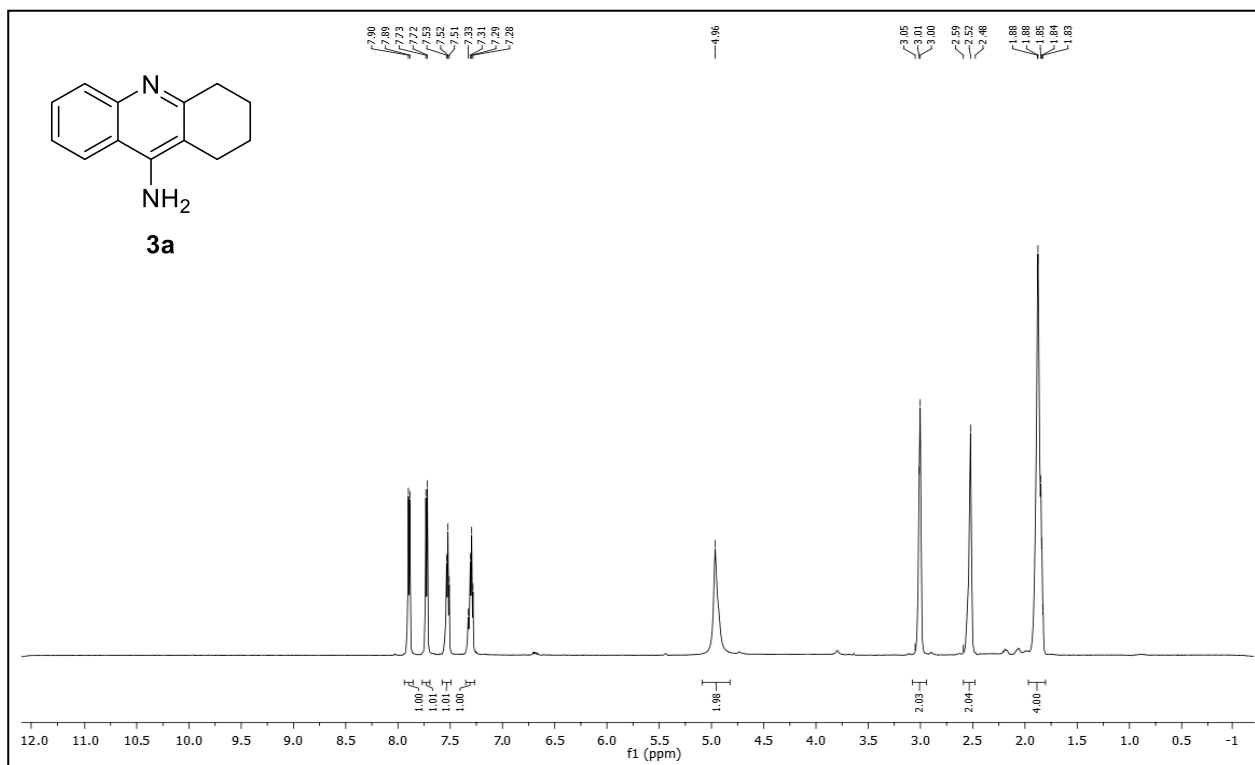

$^{13}\text{C}$  NMR, 150 MHz,  $\text{CDCl}_3$

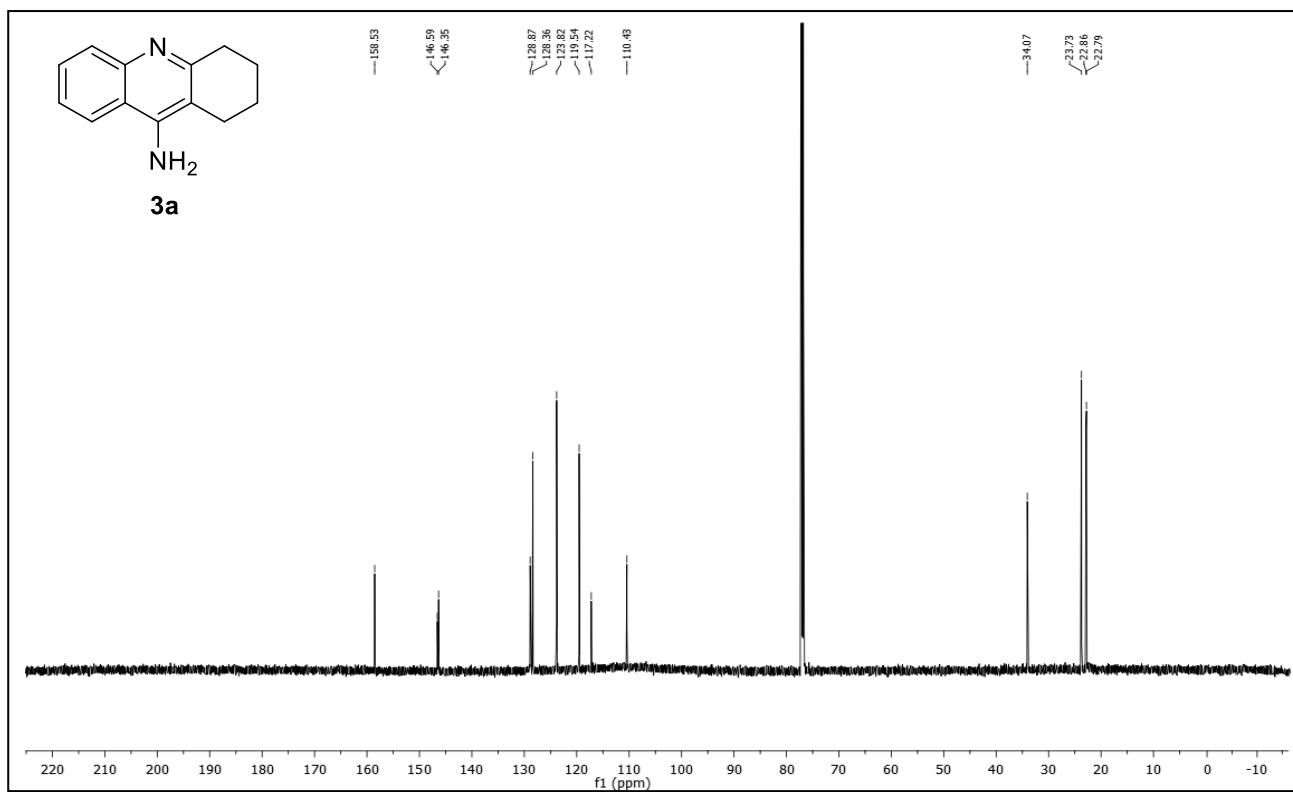

$^1\text{H}$  NMR, 600 MHz,  $\text{CDCl}_3$

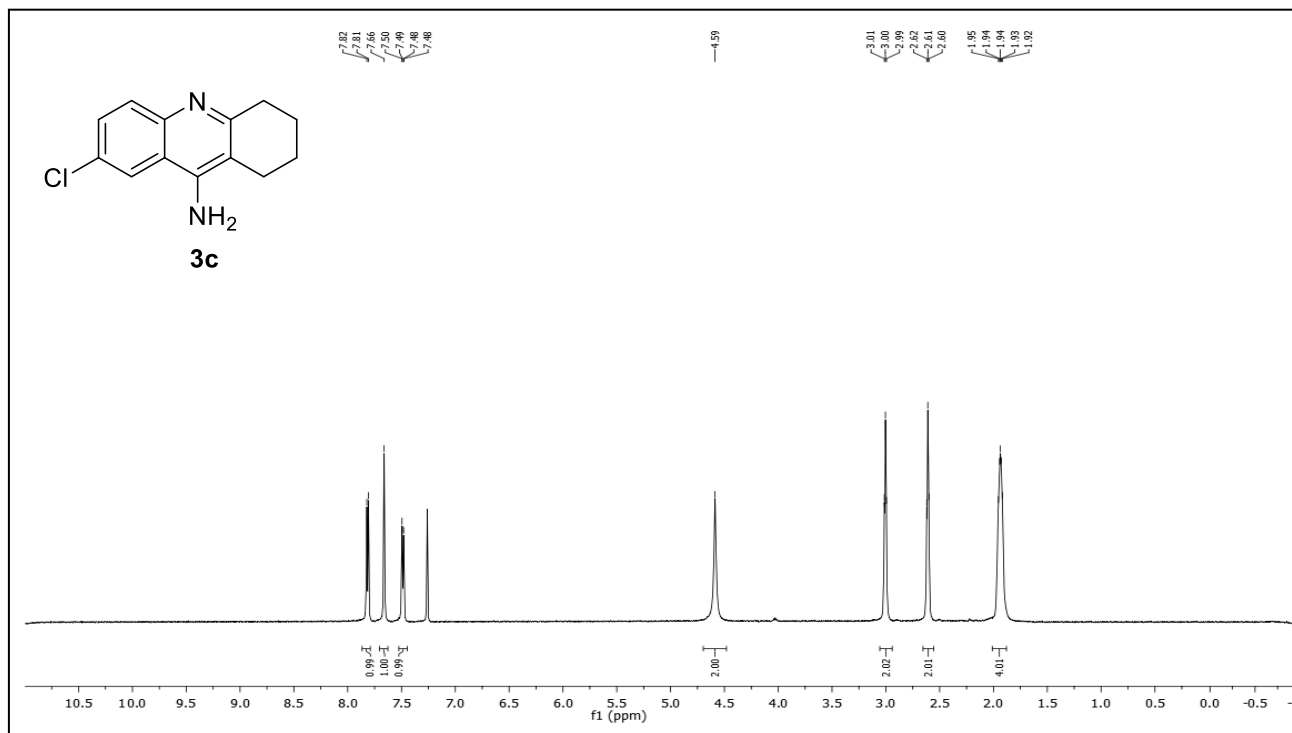

$^{13}\text{C}$  NMR, 150 MHz,  $\text{CDCl}_3$

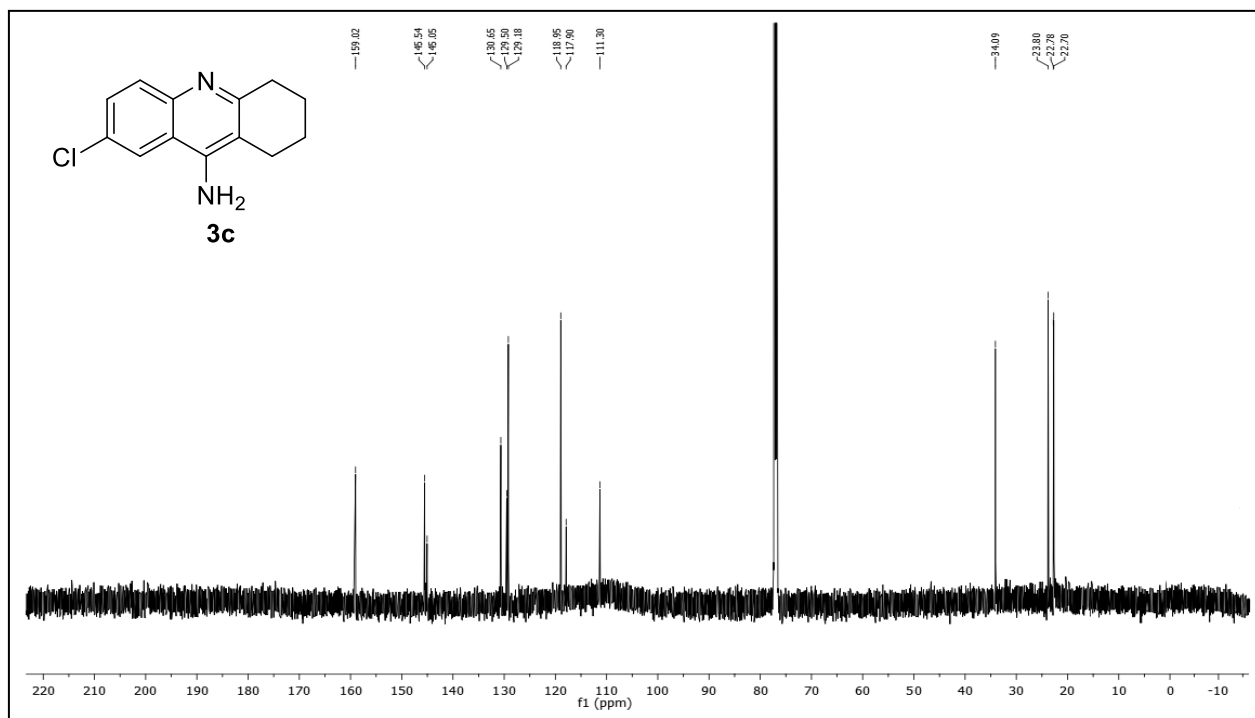

$^1\text{H}$  NMR, 600 MHz,  $\text{CDCl}_3$

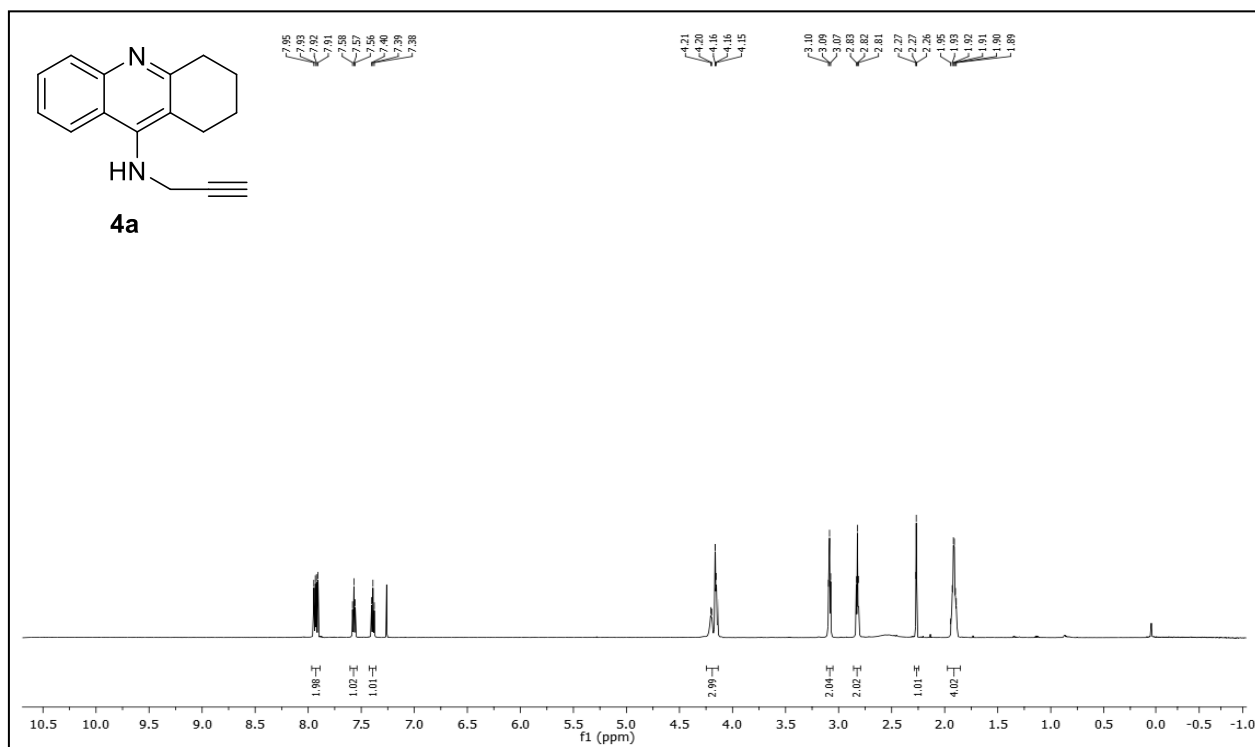

$^{13}\text{C}$  NMR, 150 MHz,  $\text{CDCl}_3$

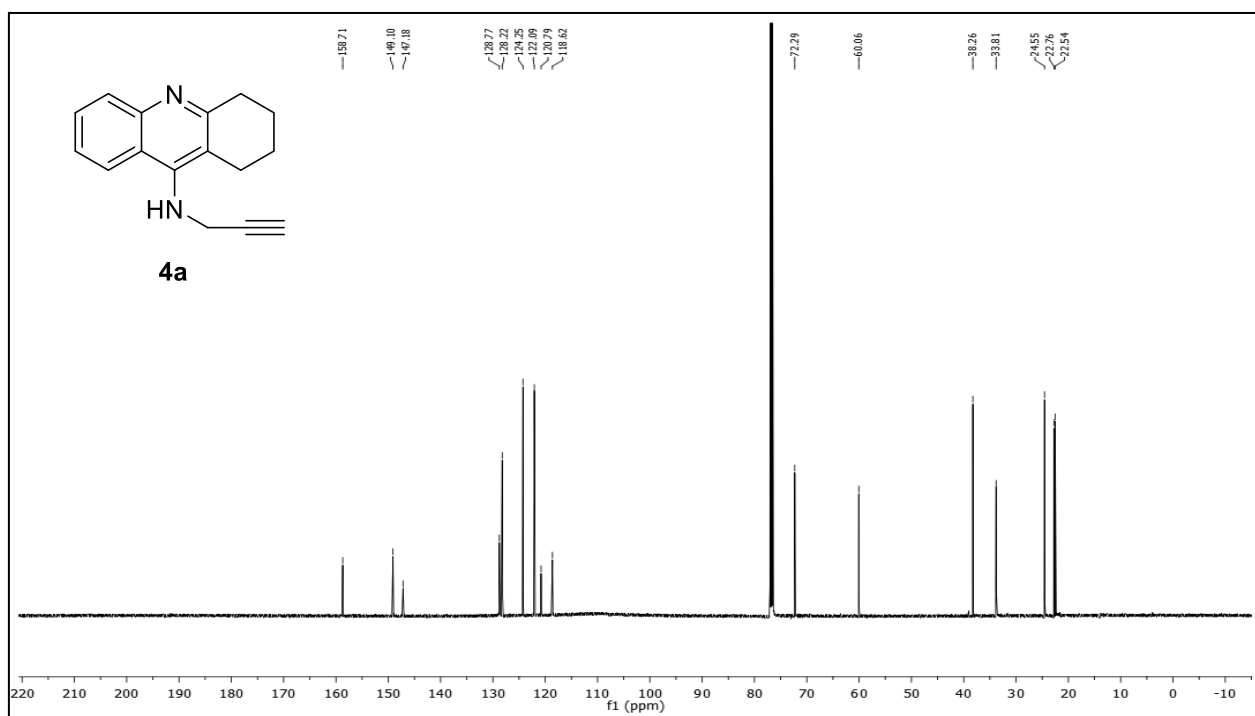

$^1\text{H}$  NMR, 600 MHz,  $\text{CDCl}_3$

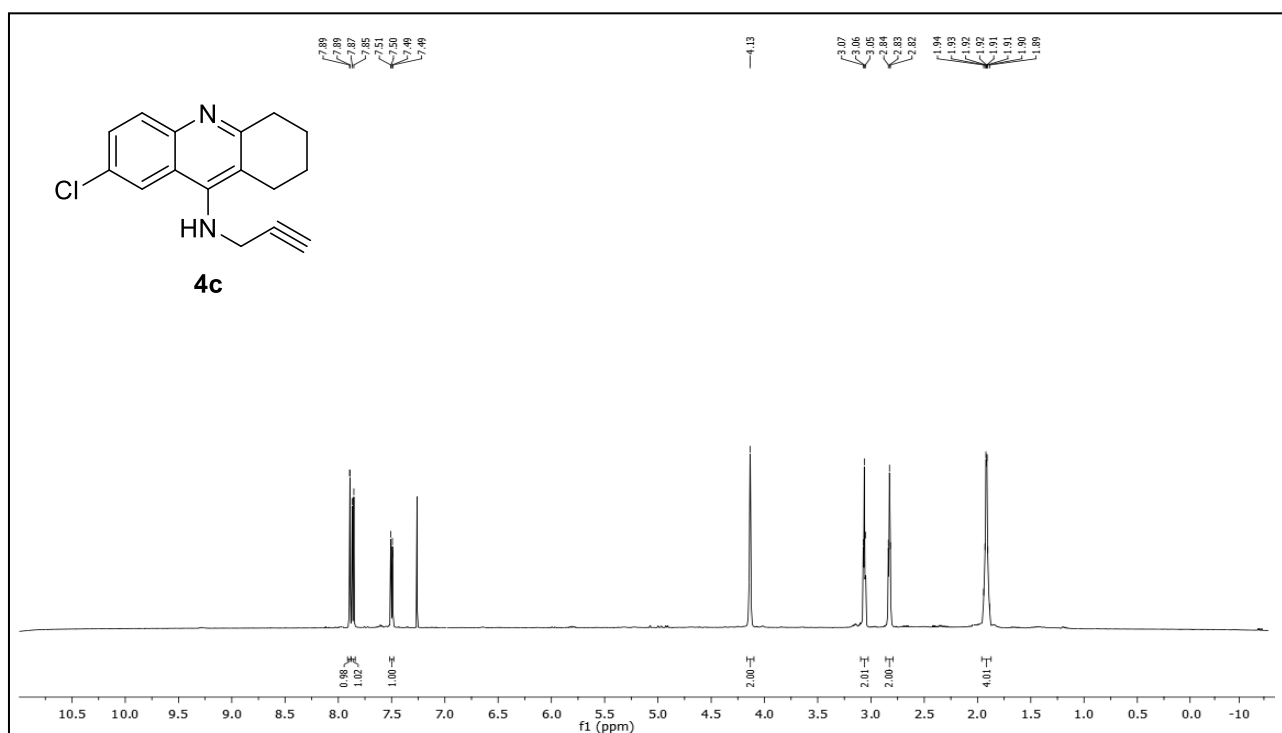

$^{13}\text{C}$  NMR, 150 MHz,  $\text{CDCl}_3$

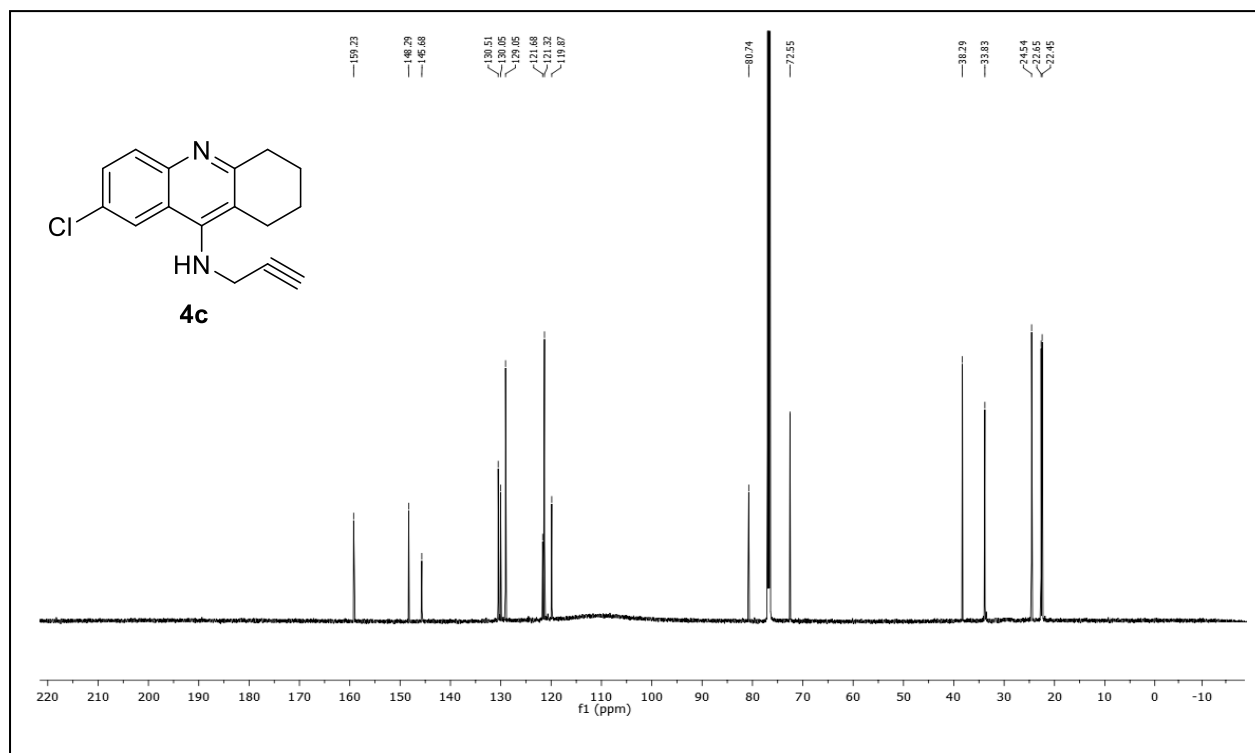

$^1\text{H}$  NMR, 600 MHz,  $\text{CDCl}_3$

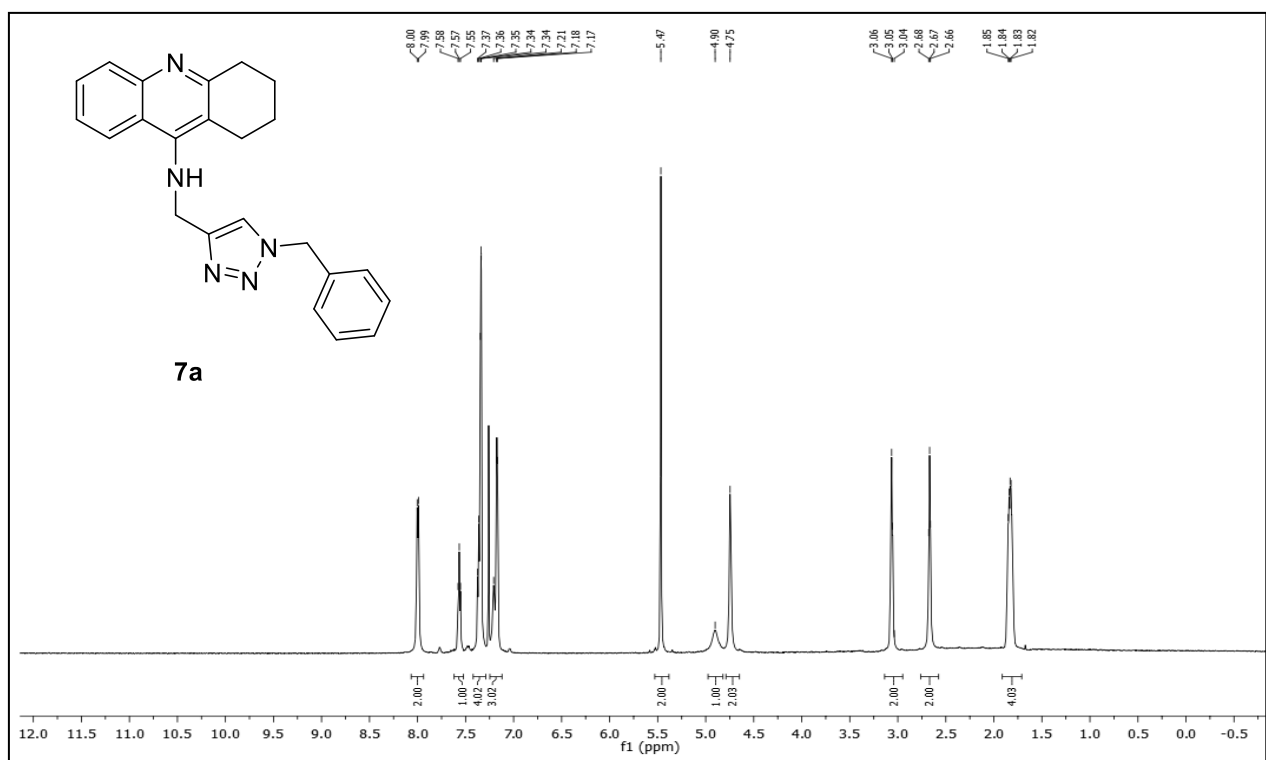

$^{13}\text{C}$  NMR, 150 MHz,  $\text{CDCl}_3$

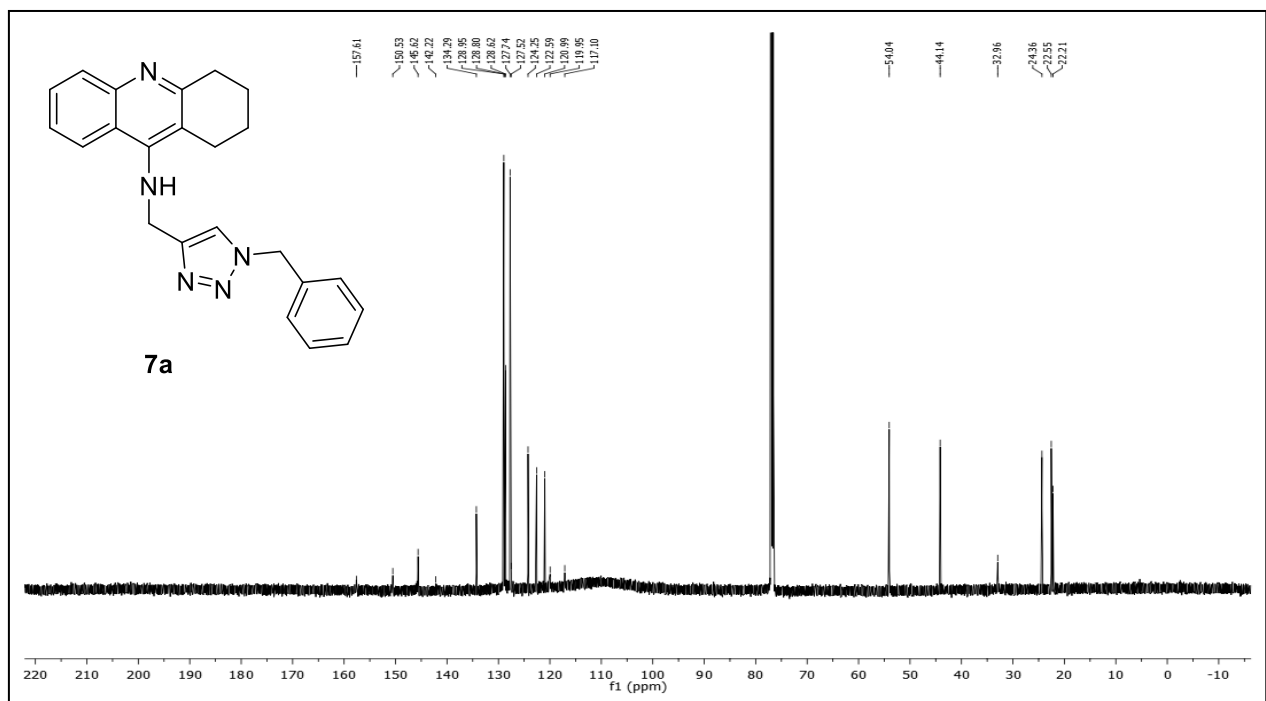

$^1\text{H}$  NMR, 600 MHz,  $\text{CDCl}_3$

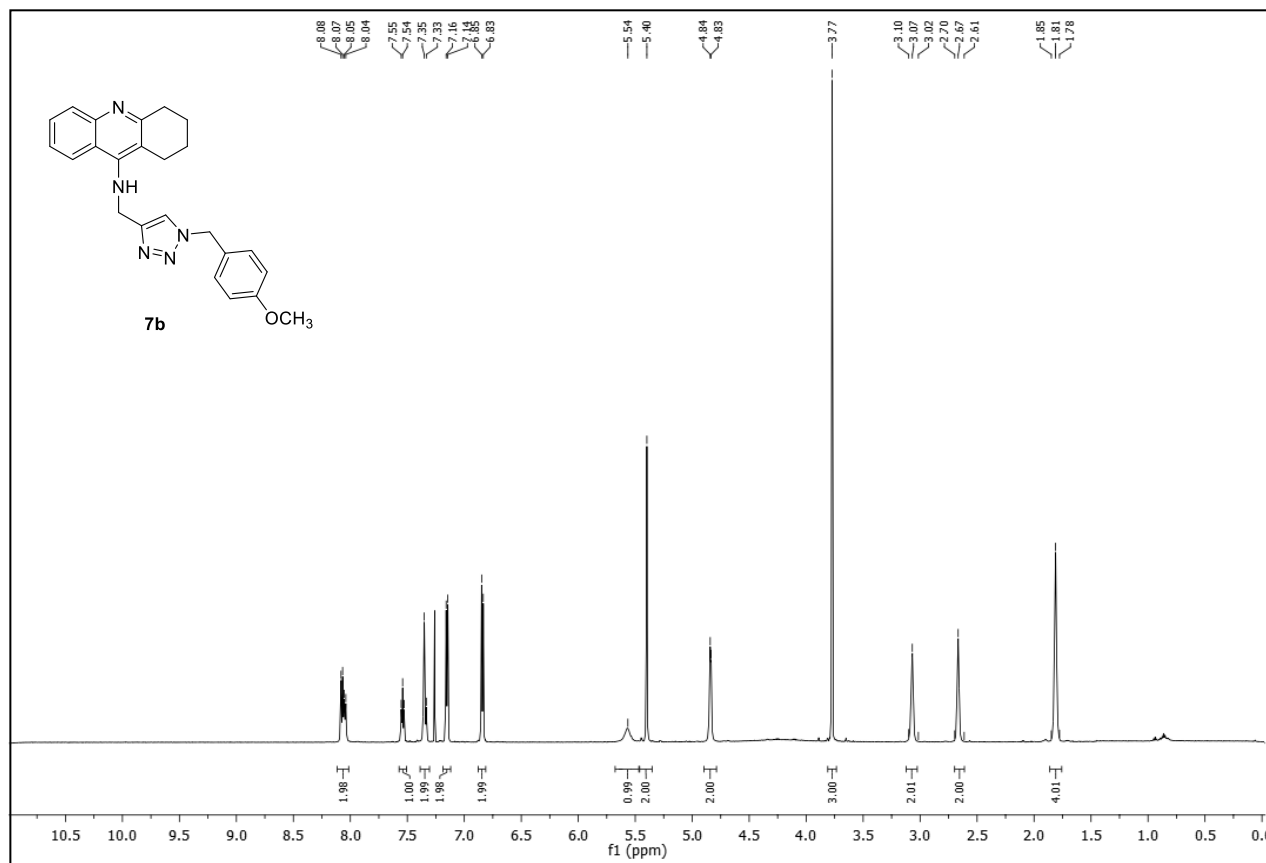

$^{13}\text{C}$  NMR, 150 MHz,  $\text{CDCl}_3$

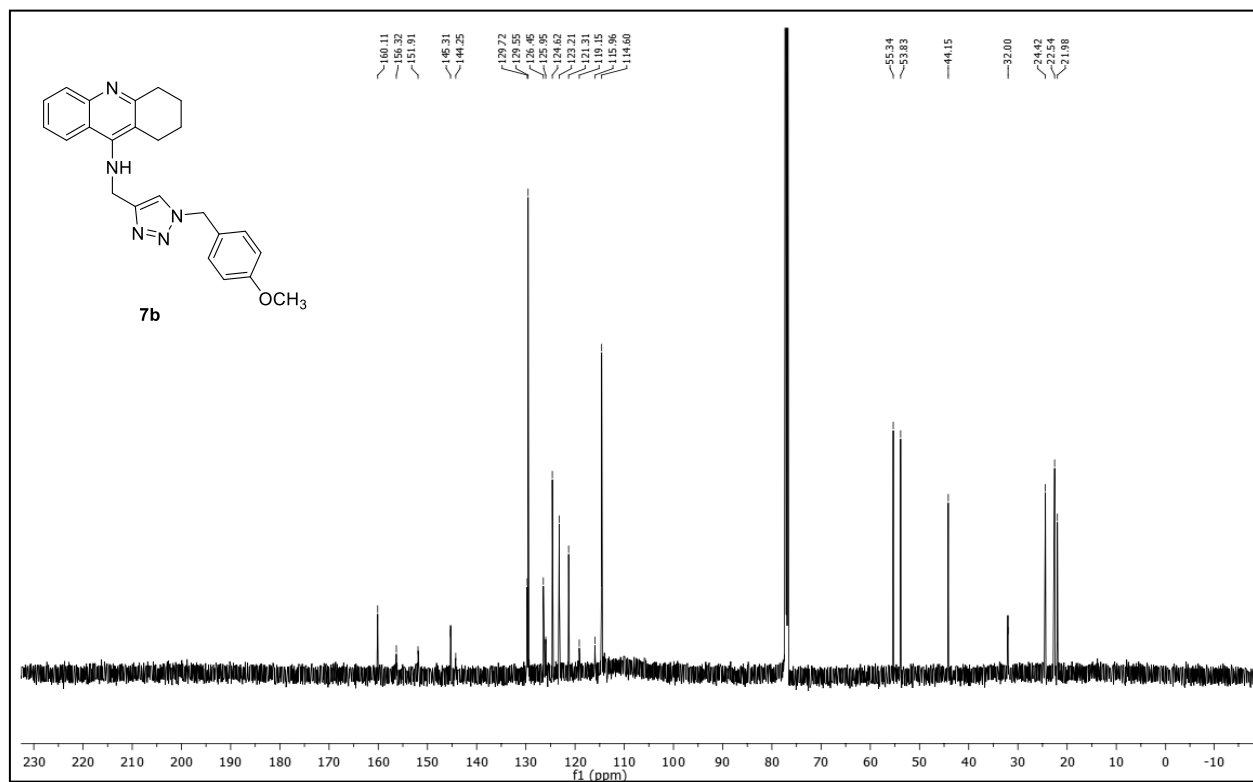

$^1\text{H}$  NMR, 600 MHz,  $\text{CDCl}_3$

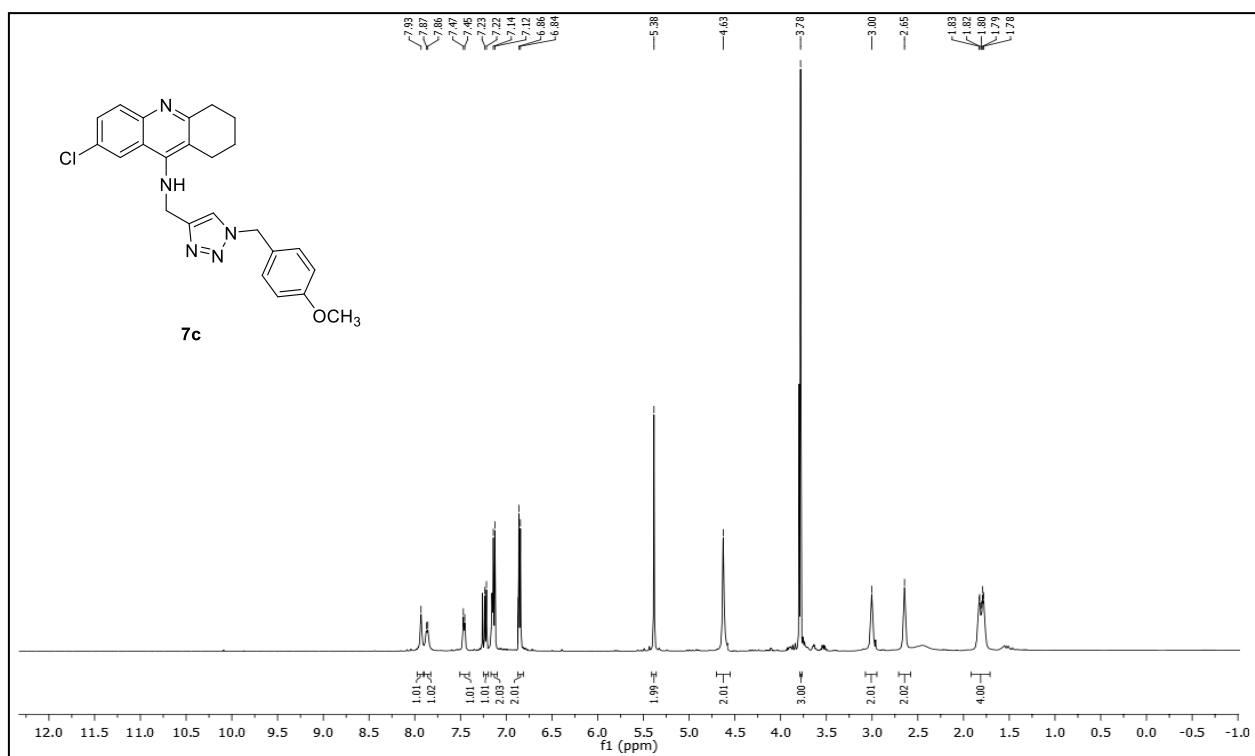

$^{13}\text{C}$  NMR, 150 MHz,  $\text{CDCl}_3$

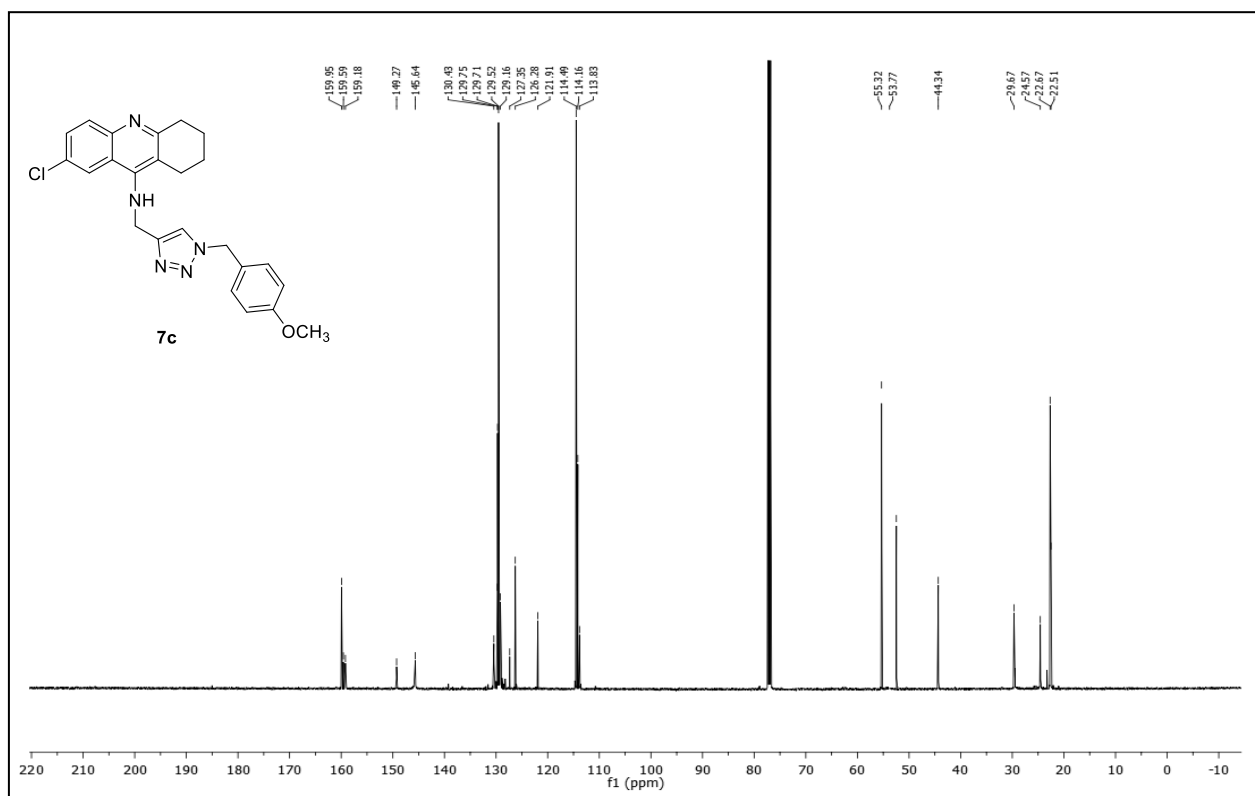

Supplement: s1 [file s1]
